# Supplementary material for: Selective proliferative response of microglia to alternative polarization signals
Source: Springer Nature journal article supplement (doi:10.1186/s12974-017-1011-6), 2017-12-01
Supplement: MOESM1 [file 15277426]

**Supplementary table 1.** Oligonucleotides used in real-time PCR assays

| Gene    | Forward sequence              | Reverse sequence              |
|---------|-------------------------------|-------------------------------|
| mKi67   | 5'-AGAGCTAACTTGCGCTGACT-3'    | 5'-TCAATACTCCTTCCAAACAGGCA-3' |
| mCdk1   | 5'-ACACGAGGTAGTGACGCTGT-3'    | 5'-TCAATCTCTGAGTCGCCGTG-3'    |
| mCcnB2  | 5'-CCGACGGTGTCCAGTGATTT-3'    | 5'-CTGAGGTTTCTTCGCCACCT-3'    |
| mArg1   | 5'-GAATCTGCATGGGCAACCT-3'     | 5'-ACACGATGTCTTTGGCAGATAT-3'  |
| mFizz1  | 5'-GGAAGTTCTTGCCAATCCAGC-3'   | 5'-AAGCCACAAGCACACCCAGT-3'    |
| mYm1    | 5'-GAAGGAGCCACTGAGGTCTG-3'    | 5'-GAGCCACTGAGCCTTCAAC-3'     |
| mMrc1   | 5'-TTCAGCTATTGGACGCGAGG-3'    | 5'-GAATCTGACACCCAGCGGAA-3'    |
| mVegfa  | 5'-AGCAGAAGTCCCATGAAGTGA-3'   | 5'-ATGTCCACCAGGGTCTCAAT-3'    |
| rKi67   | 5'-CCACAACCAGGAAGACCAGTT-3'   | 5'-TGATCCCATTATCCGCCTGC-3'    |
| rCdk1   | 5'-GGGAACAGAGAGGGTCCGTT-3'    | 5'-ATTTCCCGGATTGCCGTACT-3'    |
| rArg1   | 5'-ACAAGACAGGGCTACTTTCAGG-3'  | 5'-ACAAGACAAGGTCAACGCCA-3'    |
| rMrc1   | 5'-CAACTCTTGGACTIONCACGGCA-3' | 5'-ATGATCTGCGACTCCGACAC-3'    |
| mIL-4Ra | 5'-AACTCGCAGGTTCTGGCTGG-3'    | 5'-AAGCCCCGAGTCCTAGGTT-3'     |
| 36B4    | 5'-GGCGACCTGGAAGTCCAAC-3'     | 5'-CCATCAGCACCACGGCCTTC-3'    |

m = mouse; r = rat
