# Supplementary material for: Selective proliferative response of microglia to alternative polarization signals
Source: Springer Nature journal article supplement (doi:10.1186/s12974-017-1011-6), 2017-12-01
Supplement: MOESM3 [file 15277426]

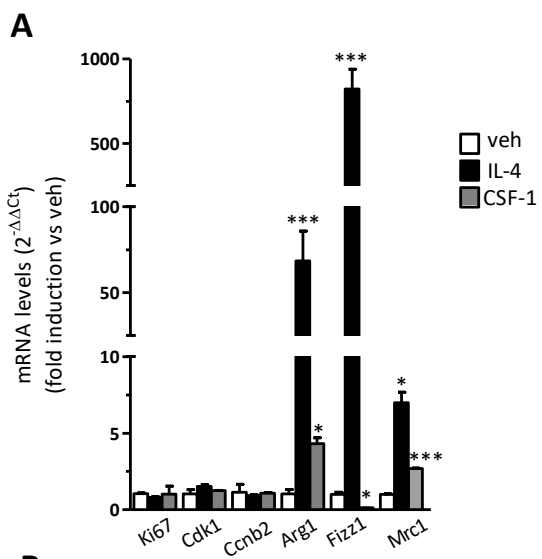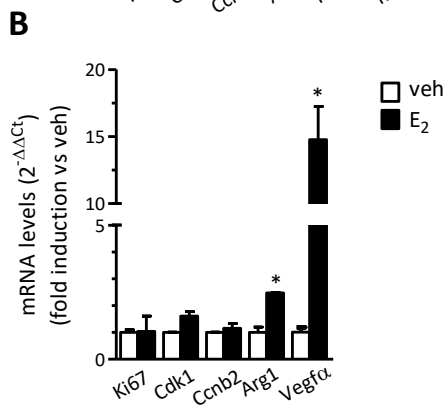

**Supplementary Figure 2.**
