# Supplementary material for: Selective proliferative response of microglia to alternative polarization signals
Source: Springer Nature journal article supplement (doi:10.1186/s12974-017-1011-6), 2017-12-01
Supplement: MOESM4 [file 12974_2017_1011_MOESM4_ESM.pdf]

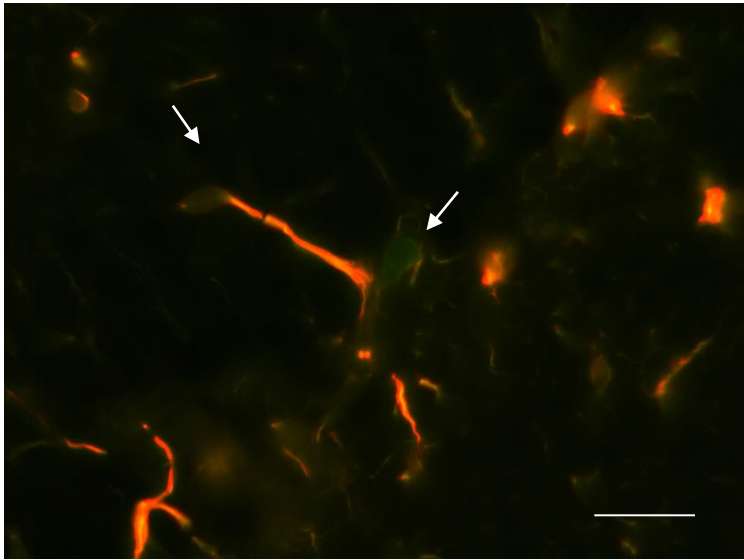

Supplementary Figure 3
